# Supplementary material
Source: publisher figshare collection journal article supplement (https://aacr.figshare.com/articles/dataset/_/22433274)

# Supplementary Figure 9

## CD4 T cells

*Cd3d, Cd3e, Cd3g, Cd28, Cd4*

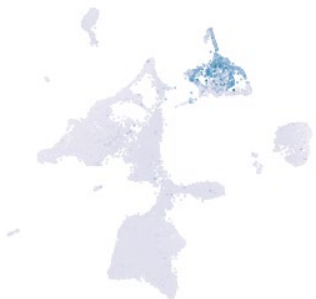

## CD8 T cells

*Cd3d, Cd3e, Cd3g, Cd28, Cd8a, Cd8b1, Gzma, Gzmb, Prf1*

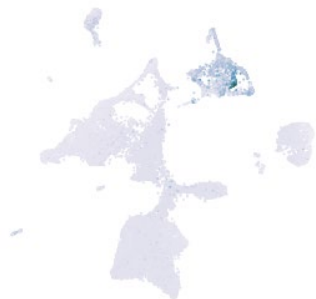

## NK cells

*Klrb1c, Ncr1, Klra4, Eomes*

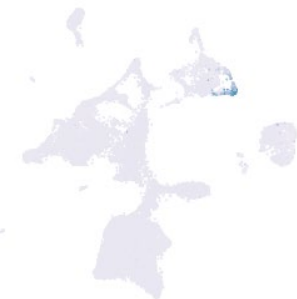

## B cells

*Cd79a, Cd79b, Cd19*

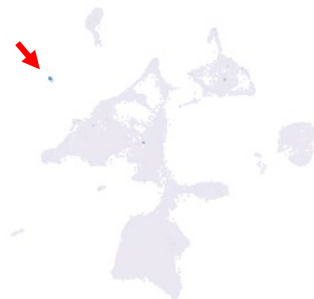

## Monocytes

*Itgam, Mafk, Msr1, Csf1r, Fn1, F13a1*

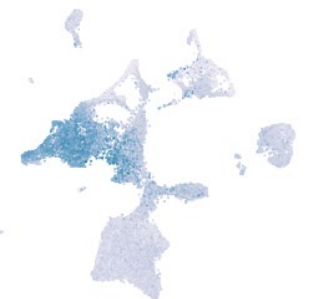

## Macrophages

*Itgam, Adgre1*

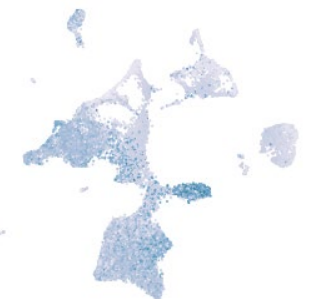

## Dendritic cells

*Batf3, Tcf4, Irf8, Siglech, Ccr9, Pascin1*

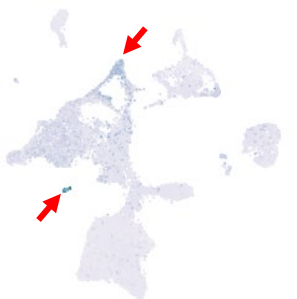

## Neutrophils

*S100a8, S100a9, Csf3r, Cxcr2, Csf1r*

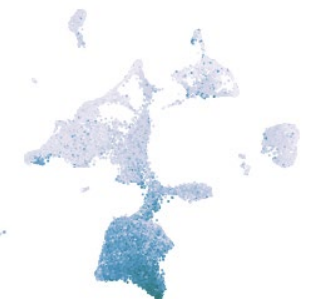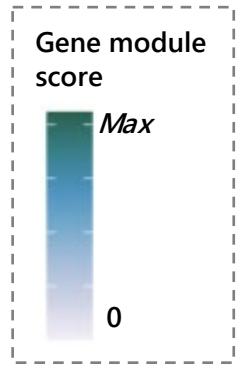

## Basophils

*Il6, Fcer1a, Gata2*

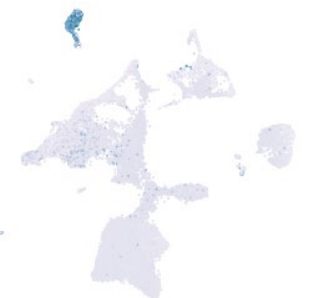

## Mast cells

*Fcer1a, Kit, Mcpt1, Mcpt2, Mcpt4, Gata2*

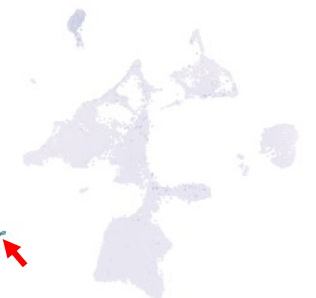

## Cancer cells

*Epcam, Cdh1*

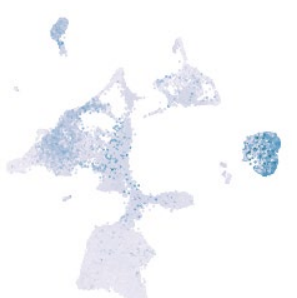

## Fibroblasts

*Col1a1, Col1a2, Col3a1, Lum, Dcn*

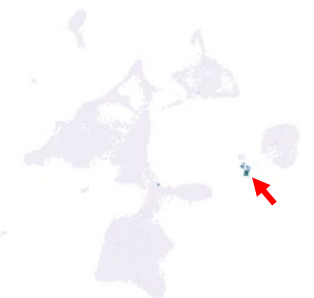

Supplement: Supplementary file 1 [file 39879711]
